# Supplementary material for: Total Cardiovascular and Limb Events and the Impact of Polyvascular Disease in Chronic Symptomatic Peripheral Artery Disease
Source: PubMed Central journal article supplement — J Am Heart Assoc. 2022 May 27;11(11):e025504. doi: 10.1161/JAHA.122.025504 (PMC9238734; doi:10.1161/jaha.122.025504), 2022-05-27
Supplement: JAH3-11-e025504-s001.pdf [file JAH3-11-e025504-s001.pdf]

## **SUPPLEMENTAL MATERIAL**

**Table S1. Selected Baseline Characteristics.**

| <b>Characteristic</b>                                        | <b>Ticagrelor<br/>(n = 6930)</b> | <b>Clopidogrel<br/>(n = 6955)</b> |
|--------------------------------------------------------------|----------------------------------|-----------------------------------|
| Median age (Q1-Q3), years                                    | 66 (60, 72)                      | 66 (60, 73)                       |
| Female sex, n (%)                                            | 1908 (27.5)                      | 1980 (28.5)                       |
| Geographic region, n (%)                                     |                                  |                                   |
| Asia                                                         | 806 (11.6)                       | 796 (11.4)                        |
| Central/South America                                        | 871 (12.6)                       | 869 (12.5)                        |
| Europe                                                       | 3739 (54.0)                      | 3759 (54.0)                       |
| North America                                                | 1514 (21.8)                      | 1531 (22.0)                       |
| PAD inclusion criterion, n (%)                               |                                  |                                   |
| Revascularization >30 days prior to randomization            | 3923 (56.6)                      | 3952 (56.8)                       |
| Abnormal ankle-brachial index and no prior revascularization | 3007 (43.4)                      | 3003 (43.2)                       |
| Median ankle-brachial index (Q1-Q3)                          | 0.70 (0.58, 0.82)                | 0.70 (0.58, 0.82)                 |
| Medical history, n (%)                                       |                                  |                                   |
| Coronary or carotid revascularization                        | 1914 (27.6)                      | 1901 (27.3)                       |
| Coronary stent implantation                                  | 1004 (14.5)                      | 964 (13.9)                        |
| Coronary artery disease*                                     | 2019 (29.1)                      | 2013 (28.9)                       |
| Number of vascular territories affected†                     |                                  |                                   |
| 1                                                            | 3874 (55.9)                      | 3930 (56.5)                       |
| 2                                                            | 2333 (33.7)                      | 2355 (33.9)                       |
| 3                                                            | 723 (10.4)                       | 670 (9.6)                         |
| Medications before randomization, n (%)                      |                                  |                                   |

|                                         |             |             |
|-----------------------------------------|-------------|-------------|
| Aspirin                                 | 4667 (67.3) | 4604 (66.2) |
| Clopidogrel                             | 2193 (31.6) | 2280 (32.8) |
| Statin                                  | 5058 (73.0) | 5123 (73.7) |
| Angiotensin-converting-enzyme inhibitor | 2826 (40.8) | 2809 (40.4) |
| Angiotensin-receptor blocker            | 1741 (25.1) | 1747 (25.1) |

\*Coronary artery disease is defined as myocardial infarction, percutaneous coronary intervention (PCI), or coronary-artery bypass grafting (CABG).

†An affected vascular territory was defined by the presence of peripheral artery disease, coronary artery disease, or cerebrovascular disease (including previous stroke, transient ischemic attack, carotid-artery stenosis, or carotid revascularization).

**Table S2. On-treatment Analyses of Total Cardiovascular and Limb Events and Procedures by Event Type.**

| <b>Event</b>                         | <b>Total Events per 100 Patient-Years</b> |                    | <b>HR (95% CI)</b> | <b>p-value</b> |
|--------------------------------------|-------------------------------------------|--------------------|--------------------|----------------|
|                                      | <b>Ticagrelor</b>                         | <b>Clopidogrel</b> |                    |                |
| Cardiovascular and limb events       | 16.4                                      | 17.6               | 0.93 (0.86-1.01)   | 0.09           |
| Acute cardiovascular and limb events | 6.6                                       | 6.6                | 0.99 (0.89-1.10)   | 0.79           |
| Cardiovascular death                 | 1.2                                       | 1.2                | 1.05 (0.85-1.29)   | 0.66           |
| Non-fatal myocardial infarction      | 1.8                                       | 1.8                | 0.96 (0.80-1.16)   | 0.20           |
| Non-fatal ischemic stroke            | 0.7                                       | 0.9                | 0.87 (0.67-1.13)   | 0.30           |
| Acute limb ischemia                  | 0.7                                       | 0.7                | 1.08 (0.79-1.47)   | 0.65           |
| Unstable angina                      | 1.8                                       | 1.9                | 0.97 (0.79-1.18)   | 0.74           |
| Transient ischemic attack            | 0.3                                       | 0.2                | 1.11 (0.68-1.83)   | 0.67           |
| Procedures                           | 9.8                                       | 10.9               | 0.90 (0.81-0.99)   | 0.0260         |
| Coronary revascularization           | 1.9                                       | 2.1                | 0.91 (0.76-1.09)   | 0.29           |
| Carotid revascularization            | 0.5                                       | 0.5                | 0.93 (0.66-1.31)   | 0.67           |
| Peripheral revascularization         | 6.3                                       | 7.2                | 0.87 (0.78-0.98)   | 0.0192         |
| Amputation for symptomatic PAD       | 1.1                                       | 1.0                | 1.03 (0.79-1.35)   | 0.81           |

**Table S3. Subgroup Analyses for Total MACE.**

| Subgroup                                | Total Events per 100 Patient-Years |             | HR (95% CI)      | Interaction p-value |
|-----------------------------------------|------------------------------------|-------------|------------------|---------------------|
|                                         | Ticagrelor                         | Clopidogrel |                  |                     |
| PAD inclusion criterion                 |                                    |             |                  | 0.84                |
| ABI/TBI                                 | 4.9                                | 4.8         | 1.01 (0.86-1.20) |                     |
| Prior revascularization                 | 5.7                                | 5.8         | 0.99 (0.87-1.14) |                     |
| Ankle-brachial index                    |                                    |             |                  | 0.78                |
| Quartile 1 (<0.58)                      | 6.8                                | 6.6         | 1.04 (0.86-1.26) |                     |
| Quartile 2 (0.58 to <0.70)              | 5.1                                | 5.0         | 1.03 (0.83-1.28) |                     |
| Quartile 3 (0.70 to <0.82)              | 5.4                                | 5.3         | 1.01 (0.81-1.25) |                     |
| Quartile 4 ( $\geq$ 0.82)               | 4.2                                | 4.7         | 0.90 (0.72-1.13) |                     |
| History of coronary stent implantation  |                                    |             |                  | 0.14                |
| Yes                                     | 7.5                                | 8.7         | 0.85 (0.67-1.08) |                     |
| No                                      | 5.0                                | 4.8         | 1.04 (0.92-1.17) |                     |
| History of coronary artery disease      |                                    |             |                  | 0.68                |
| Yes                                     | 7.9                                | 8.1         | 0.97 (0.83-1.15) |                     |
| No                                      | 4.3                                | 4.2         | 1.02 (0.89-1.17) |                     |
| Number of vascular territories affected |                                    |             |                  | 0.67                |
| 1                                       | 3.9                                | 3.8         | 1.05 (0.90-1.23) |                     |
| 2                                       | 6.2                                | 6.5         | 0.95 (0.80-1.12) |                     |
| 3                                       | 10.3                               | 10.5        | 0.98 (0.76-1.26) |                     |

**Table S4. Subgroup Analyses for Total MALE.**

| Subgroup                                | Total Events per 100 Patient-Years |             | HR (95% CI)      | Interaction p-value |
|-----------------------------------------|------------------------------------|-------------|------------------|---------------------|
|                                         | Ticagrelor                         | Clopidogrel |                  |                     |
| PAD inclusion criterion                 |                                    |             |                  | 0.28                |
| ABI/TBI                                 | 1.3                                | 1.5         | 0.86 (0.62-1.20) |                     |
| Prior revascularization                 | 2.9                                | 2.6         | 1.08 (0.86-1.35) |                     |
| Ankle-brachial index                    |                                    |             |                  | 0.0472              |
| Quartile 1 (<0.58)                      | 2.8                                | 3.7         | 0.77 (0.57-1.06) |                     |
| Quartile 2 (0.58 to <0.70)              | 1.7                                | 1.9         | 0.86 (0.58-1.27) |                     |
| Quartile 3 (0.70 to <0.82)              | 1.7                                | 1.3         | 1.37 (0.90-2.08) |                     |
| Quartile 4 ( $\geq$ 0.82)               | 2.5                                | 1.8         | 1.39 (0.93-2.08) |                     |
| History of coronary stent implantation  |                                    |             |                  | 0.98                |
| Yes                                     | 1.6                                | 1.5         | 1.01 (0.60-1.70) |                     |
| No                                      | 2.3                                | 2.2         | 1.01 (0.83-1.24) |                     |
| History of coronary artery disease      |                                    |             |                  | 0.60                |
| Yes                                     | 1.9                                | 2.0         | 0.93 (0.65-1.34) |                     |
| No                                      | 2.3                                | 2.2         | 1.04 (0.84-1.30) |                     |
| Number of vascular territories affected |                                    |             |                  | 0.57                |
| 1                                       | 2.4                                | 2.2         | 1.10 (0.86-1.40) |                     |
| 2                                       | 1.9                                | 2.1         | 0.89 (0.64-1.25) |                     |
| 3                                       | 2.0                                | 2.2         | 0.91 (0.49-1.69) |                     |

Figure S1. Rates of Second MACE or MALE Events by Type of First Nonfatal MACE or MALE Event.

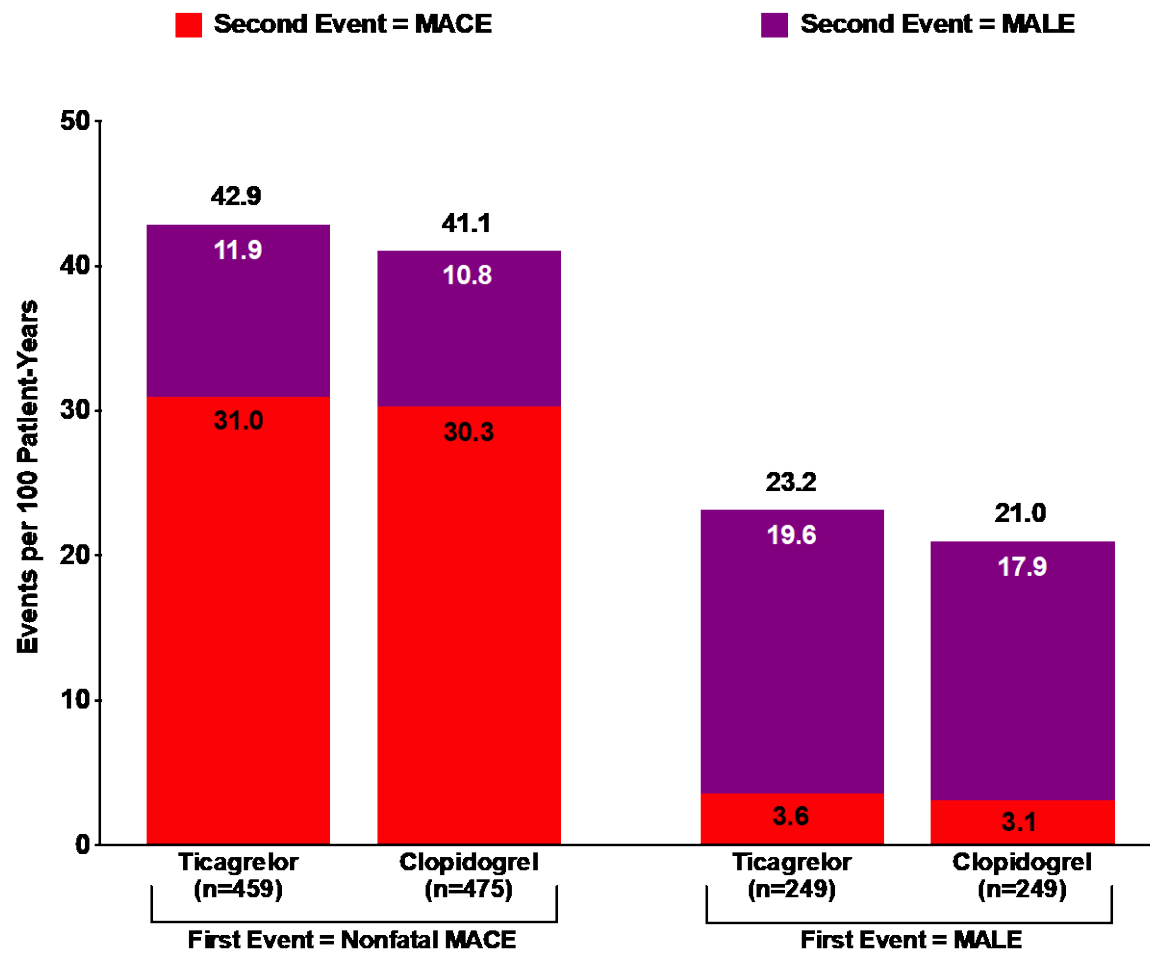

Values above bars are the sum of the rates of cardiovascular events and procedures as a second event. Values within bars are the rates of MACE or the rates of MALE as a second event. MACE, major adverse cardiovascular event; MALE, major adverse limb events.

**Figure S2. Mean Cumulative Functions.**

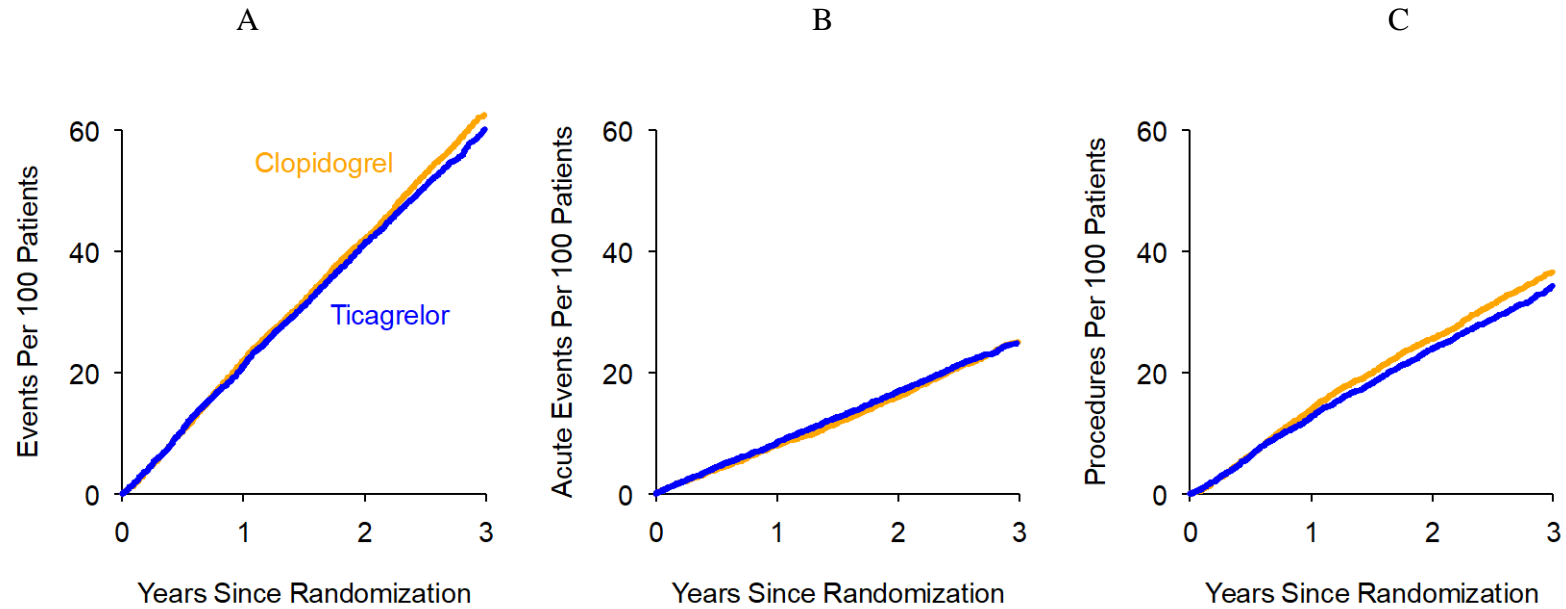

Panel A: total cardiovascular and limb events and procedures. Panel B: total acute cardiovascular and limb events. Panel C: total procedures. The estimated numbers of events per 100 patients in the ticagrelor and clopidogrel groups at 3 years were 60.0 and 62.5 for cardiovascular and limb events, 24.8 and 25.0 for acute cardiovascular and limb events, and 34.2 and 36.6 for procedures, respectively.



**Figure S3. Subgroup Analyses for Total Cardiovascular and Limb Events and Procedures.**

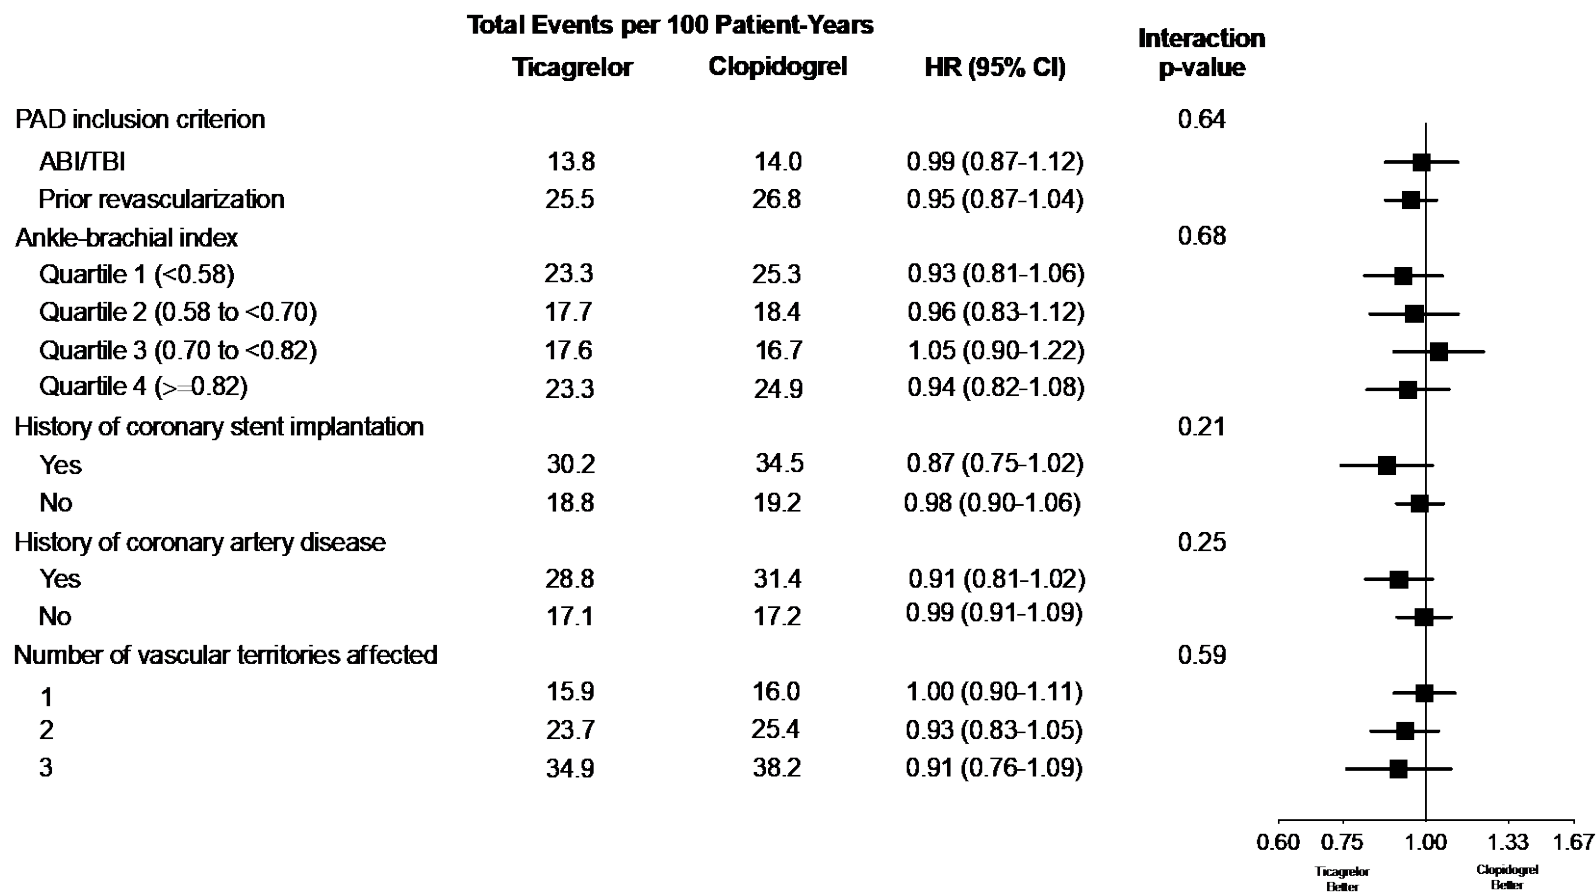

Marginal proportional hazard regression models with terms for the interaction between treatment and subgroups were constructed to estimate subgroup treatment effects and heterogeneity with respect to total cardiovascular and limb events and procedures. CI, confidence interval; HR, hazard ratio.
